# Supplementary material for: Ester type banana-shaped liquid crystalline monomers: synthesis and physical properties
Source: Royal Society of Chemistry journal article supplement (doi:10.1039/b400246f), 2004-01-01
Supplement: b400246f.doc [file b400246f.doc]

## ELECTRONIC SUPPORTING INFORMATION

## Refernce Number B400246

Ester type banana-shaped liquid crystalline monomers:

Synthesis and physical properties

Katalin Fodor-Csorba,Anikó Vajda, Antal Jákli, Christian Slugovc, Gregor Trimmel, Dietrich Demus, Eszter Gács-Baitz,Sándor Holly, Giancarlo Galli

## Ethyl 4’-(9-decen-1-yloxy)-1,1’-biphenyl-4-carboxylate (4a)[[1]](#endnote-2)

10-bromo-1-decene (**2a**) (3.7 g, 30.99 mmol) and ethyl 4’-hydroxy-biphenyl-4-carboxylate (**3**) (5.0 g, 20.66 mmol), freshly dried potassium carbonate (3.2 g, 23.33 mmol) in dry 2-butanone (100 ml) and a catalytic amount of tetrabutylammonium bromide were stirred and refluxed for four hours. After cooling to room temperature, 400 ml of water was added, the organic layer separated, dried over calcium chloride, and evaporated to dryness. The residue was crystallized from ethanol. Yield 6.2 g (79 %). IR max(KBr)/cm-1 3078 (as=CH2, vinyl), 2922 (asCH2), 2850 (sCH2), 1713 (C=O, ester), 1642 (C=C, vinyl), 1604 (CArCAr), 836 (CArH, p-disubst.); elemental analysis calcd (%) for C25H32O3 (380.53): C, 78.91; H, 8.48, found C, 78.89, H, 8.44.

**Ethyl 4’-(10-undecen-1-yloxy)-1,1’-biphenyl-4-carboxylate (4b)**

Quantitites: **2b** (11.65 g, 50.00 mmol), **3** (9.6g, 40.00 mmol), freshly dried potassium carbonate (6.3 g, 46.00 mmol), dry methyl ethyl ketone (150ml), catalytic amount of tetrabutyl ammonium bromide. The reaction mixture was worked up as described for **4a**. Yield 12.2 g (77 %). IR max(KBr)/cm-1 3077 (as=CH2, vinyl), 2922 (asCH2), 2851 (sCH2), 1716 (C=O, ester), 1643 (C=C, vinyl), 1604 (CArCAr), 835 (CArH, p-disubst.); elemental analysis calcd (%) for C26H34O3 (394.56): C, 79.15, H 8.69; found C, 79.10, H, 8.65.

**4’-(9-Decen-1-yloxy)-1,1’-biphenyl-4-carboxylic acid (5a)**

Ester **4a** (3.35 g, 8.81 mmol) and potassium hydroxide (1.5 g, 27.0 mmol) water (6 ml), dioxane (30 ml), ethanol (27 ml) were refluxed for three hours. After cooling to room temperature the precipitate was filtered off and heated in acetic acid/ethanol (40/40 ml/ml) for one hour. The product was recrystallized from ethyl acetate-ethanol 1:1 mixture. Yield 2.8 g (91 %). IR max(KBr)/cm-1 3300-2200 (broad, OH, carboxylic acid dimer), 3067 (as=CH2, vinyl), 2923 (asCH2), 2852 (sCH2), 1679 (C=O, carboxylic acid dimer), 1642 (C=C, vinyl), 1604 (CArCAr), 947 (broad, OH, carboxylic acid dimer), 833 (CArH, p-disubst.); elemental analysis calcd (%) for C23H28O3 (352.46): C, 78.38, H, 8.01; found C 78.32, H 7.99.

**4’-(10-Undecen-1-yloxy)-1,1’-biphenyl-4-carboxylic acid (5b)[[2]](#endnote-3)**

Ester **4b** (8.5 g, 21.54 mmol) and potassium hydroxide (3.26 g, 58.2 mmol) were refluxed for 1.5 hours in the mixture of ethanol (35 ml), water (100 ml) and dioxane (25 ml). The precipitate was filtered off and boiled with 100 ml acidified water (pH ~ 4). Yield: 7.7 g, (97 %). IR max(KBr)/cm-1 3300-2500 (broad, OH, carboxylic acid dimer), 3080 (as=CH2, vinyl), 2922 (asCH2), 2851 (sCH2), 1686 (C=O, carboxylic acid dimer), 1643 (C=C, vinyl), 1604 (CArCAr), 912 (broad, OH, carboxylic acid dimer), 836 (CArH, p-disubst.); elemental analysis calcd (%) for C24H30O3 (366.50): C, 78.22, H, 8.75; found C, 78.12, H, 8.73.

**4’-(9-Decen-1-yloxy)-1,1’-biphenyl-4-carbonyl chloride (6a)**

Acid **5a** (3.2 g, 9.09 mmol) and oxalyl chloride (20 ml) were refluxed for four hours. The excess of the reagent was distilled off and the resulting solid was recrystallized from cyclohexane. Yield 3.1 g. (89 %); 1H NMR (CDCl3):  =1.25-2.08 (m, 16H, 8 CH2), 4.03 (t, 2H, J= 6.8 Hz, OCH2), 4.93 (m, 1H, Jcis= 10.3 Hz, CH= ), 5.01 (m,1H, Jtrans= 17.2 Hz, CH=), 5.82 (m, 1H,=CH), 7.0 (m, 2H, H3’+H5’),7.57 (m, 2H, H2’+H6’), 7.68 (m, 2H, H3+H5), 8.14 (m, 2H, H2+H6).

***Table 1. Quantities of reagents and conditions used in synthesis of Ia-Vb***

| **Target** | **Resorcinol**  **[g/mmol]** | **6a**  **[g/mmol]** | **6b**  **[g/mmol]** | **2-butanone**  **[ml]** | **NEt3**  **[ml]** | **Crystal-lization** | **Yield**  **[g/%]** |
| --- | --- | --- | --- | --- | --- | --- | --- |
| **Ia**  **10PBBC** | **7**  0.33/3.0 | 2.33/6.0 | - | 20 | 0.65 | EtOAc | 1.1/47 |
| **Ib**  **11PBBC** | **7**  0.15/1.35 | - | 1.0/2.6 | 20 | 0.65 | EtOAc | 0.5/47 |
| **IIa**  **10MePBBC** | **8**  0.39/3.16 | 2.25/6.33 | - | 20 | 0.65 | EtOAc | 1.2/51 |
| **IIb**  **11MePBBC** | **8**  0.16/1.30 | - | 1.0/2.6 | 20 | 0.70 | EtOAc | 0.5/48 |
| **IIIa**  **10ClPBBC** | **9**  0.24/1.66 | 1.23/3.32 | - | 20 | 0.5 | **A** and **B** | 0.8/58 |
| **IIIb**  **11ClPBBC** | **9**  0.28/1.91 | - | 1.47/3.82 | 25 | 0.5 | **A** and **B** | 0.7/43 |
| **IVa**  **10DClPBBC** | **10**  0.29/1.66 | 1.23/3.32 | - | 20 | 0.5 | EtOAc | 0.9/65 |
| **IVb**  **11DClPBBC** | **10**  0.31/1.75 | - | 1.3/3.38 | 25 | 0.4 | EtOAc | 0.6/39 |
| **Va**  **10NO2PBBC** | **11**  0.41/2.57 | 2.0/5.39 | - | 20 | 1.0 | EtOAc | 1.4/66 |
| **Vb**  **11NO2PBBC** | **11**  0.60/4.06 | - | 3.14/8.16 | 25 | 1.1 | EtOAc | 1.25/36 |

**A**: Ethyl acetate (EtOAc):n-hexane 1:1

**B**: 2-butanone:ethyl alcohol 1:1

1. Zu-Sheng Xu,R.P. Lemieux, A. Natansohn, P. Rochon and R. Shashidar, *Liq. Cryst.,* 1999, **26**, 351. [↑](#endnote-ref-2)
2. T.E. Mann and D. Lacey, *Liq. Cryst*., 2000, **27**, 299. [↑](#endnote-ref-3)
